# Supplementary material
Source: PubMed Central journal article supplement (PMC8578201)
Supplement: NIHMS1719185-supplement-Supplemental_table.pdf [file NIHMS1719185-supplement-Supplemental_table.pdf]

**Supplementary Table 1: Previously reported variants associated with primary non-response to anti-TNF $\alpha$  biologics in the treatment of inflammatory bowel disease, and their significance in the discovery cohort**

| Chr | Variant        | Risk Allele | OR   | P    | Potential Genes           |
|-----|----------------|-------------|------|------|---------------------------|
| 1   | rs6679677 [1]  | A           | 0.57 | 0.86 | <i>PTPN22, PHTF1</i>      |
| 6   | rs3851228 [1]  | T           | 0.52 | 0.52 | <i>TRAF3IP2-AS1</i>       |
| 9   | rs4743820 [1]  | T           | 0.85 | 0.25 | <i>NFIL3</i>              |
| 11  | rs568617 [1]   | T           | 0.85 | 0.30 | <i>FIBP</i>               |
| 12  | rs653178 [1]   | T           | 0.95 | 0.04 | <i>SH2B3, ATXN2</i>       |
| 13  | rs3742130 [1]  | A           | 0.68 | 0.93 | <i>UBAC2, GPR18</i>       |
| 21  | rs2284553 [1]  | G           | 0.76 | 0.92 | <i>IFNGR2, IFNAR1, IL</i> |
| 9   | rs1330307 [1]  | C           | 0.82 | 0.52 | Lnc-RNA                   |
| 3   | rs762787 [2]   | T           | 0.96 | 0.04 | <i>LTF</i>                |
| 13  | rs9572250 [2]  | G           | 0.71 | 0.83 | <i>KLHL1</i>              |
| 9   | rs523781 [2]   | C           | 0.61 | 0.81 | Intergenic                |
| 12  | rs767455 [3]   | C           | 0.78 | 0.65 | <i>TNFRSF1A</i>           |
| 1   | rs1061624 [3]  | G           | 0.66 | 0.61 | <i>TNFRSF1B</i>           |
| 1   | rs976881 [4]   | C           | 0.61 | 0.35 | <i>TNFRSF1B</i>           |
| 1   | rs652625 [4]   | A           | 0.55 | 0.99 | <i>TNFRSF1B</i>           |
| 2   | rs12469362 [5] | C           | 0.66 | 0.59 | <i>ADAM17</i>             |

|    |               |   |      |      |                                                                                               |
|----|---------------|---|------|------|-----------------------------------------------------------------------------------------------|
| 10 | rs1800682 [6] | G | 0.83 | 0.67 | <i>ACTA2</i>                                                                                  |
| 1  | rs4645983 [6] | A | 0.96 | 0.08 | <i>CASP9</i>                                                                                  |
| 1  | rs763110 [6]  | T | 0.86 | 0.21 | <i>FASLG</i>                                                                                  |
| 11 | rs1813443 [7] | C | 0.60 | 0.39 | <i>CNTN5</i>                                                                                  |
| 7  | rs1568885 [7] | A | 0.61 | 0.67 | Lnc-RNA                                                                                       |
| 1  | rs3766606[8]  | T | 1.07 | 0.66 | <i>TNFRSF9</i>                                                                                |
| 1  | rs4845604[8]  | A | 0.79 | 0.23 | <i>RORC</i>                                                                                   |
| 2  | rs6708413[8]  | A | 1.42 | 0.19 | <i>IL1R2, IL18RAP,</i><br><i>IL18R1, IL1R1,</i><br><i>IL1RL1, IL1RL2</i>                      |
| 3  | rs3197999[8]  | A | 1.13 | 0.54 | <i>MST1, PFKFB4,</i><br><i>MST1R, UCN2, GPX ,</i><br><i>IP6K2, BSN, IP6K1,</i><br><i>USP4</i> |
| 3  | rs9847710[8]  | C | 1.09 | 0.57 |                                                                                               |
| 3  | rs17200795[8] | G | 1.44 | 0.03 | <i>TBC1D5</i>                                                                                 |
| 3  | rs2045307[8]  | T | 1.19 | 0.36 |                                                                                               |
| 6  | rs2503322[8]  | G | 1.05 | 0.68 |                                                                                               |

|    |               |   |      |      |                                 |
|----|---------------|---|------|------|---------------------------------|
| 7  | rs1182188[8]  | C | 0.97 | 0.71 | <i>CARD11, GNA12,<br/>TTYH3</i> |
| 8  | rs921720[8]   | G | 1.02 | 0.95 | <i>TRIB1</i>                    |
| 9  | rs4246905[8]  | C | 0.91 | 0.61 | <i>TNFSF8, TNFSF15,<br/>TNC</i> |
| 10 | rs10761659[8] | G | 1.11 | 0.57 |                                 |
| 12 | rs7956809[8]  | G | 0.31 | 0.03 | <i>Keratin 4</i>                |
| 16 | rs1728785[8]  | C | 1.05 | 0.95 | <i>ZFP90</i>                    |
| 18 | rs8083571[8]  | G | 1.08 | 0.51 |                                 |

**Supplementary references:**

1. Burke KE, Khalili H, Garber JJ, Haritunians T, McGovern DPB, Xavier RJ, et al. Genetic Markers Predict Primary Nonresponse and Durable Response to Anti-Tumor Necrosis Factor Therapy in Ulcerative Colitis. *Inflamm Bowel Dis*. 2018;24(8):1840-8.
2. Wang MH, Fritton JJ, Raffals LE, Leighton JA, Pasha SF, Picco MF, et al. Novel Genetic Risk Variants Can Predict Anti-TNF Agent Response in Patients With Inflammatory Bowel Disease. *J Crohns Colitis*. 2019;13(8):1036-43.

3. Matsukura H, Ikeda S, Yoshimura N, Takazoe M, Muramatsu M. Genetic polymorphisms of tumour necrosis factor receptor superfamily 1A and 1B affect responses to infliximab in Japanese patients with Crohn's disease. *Aliment Pharmacol Ther.* 2008;27(9):765-70.
4. Steenholdt C, Enevold C, Ainsworth MA, Brynskov J, Thomsen OO, Bendtzen K. Genetic polymorphisms of tumour necrosis factor receptor superfamily 1b and fas ligand are associated with clinical efficacy and/or acute severe infusion reactions to infliximab in Crohn's disease. *Aliment Pharmacol Ther.* 2012;36(7):650-9.
5. Dideberg V, Theatre E, Farnir F, Vermeire S, Rutgeerts P, De Vos M, et al. The TNF/ADAM 17 system: implication of an ADAM 17 haplotype in the clinical response to infliximab in Crohn's disease. *Pharmacogenet Genomics.* 2006;16(10):727-34.
6. Hlavaty T, Pierik M, Henckaerts L, Ferrante M, Joossens S, van Schuerbeek N, et al. Polymorphisms in apoptosis genes predict response to infliximab therapy in luminal and fistulizing Crohn's disease. *Aliment Pharmacol Ther.* 2005;22(7):613-26.
7. Thomas D, Gazouli M, Karantanos T, Rigoglou S, Karamanolis G, Bramis K, et al. Association of rs1568885, rs1813443 and rs4411591 polymorphisms with anti-TNF medication response in Greek patients with Crohn's disease. *World J Gastroenterol.* 2014;20(13):3609-14.
8. Barber GE, Yajnik V, Khalili H, Giallourakis C, Garber J, Xavier R, et al. Genetic Markers Predict Primary Non-Response and Durable Response To Anti-TNF Biologic Therapies in Crohn's Disease. *Am J Gastroenterol.* 2016;111(12):1816-22.
